# Supplementary material for: Oxidative stress and the presence of bacteria increase gene expression of the antimicrobial peptide aclasin, a fungal CSαβ defensin in Aspergillus clavatus
Source: PeerJ. 2019 Feb 25;7:e6290. doi: 10.7717/peerj.6290 (PMC6394349; doi:10.7717/peerj.6290)
Supplement: Supplemental Information 6 [file peerj-07-6290-s006.xlsx]

## Sheet: Fig1
Time (h)	aclasin relative expression			Biomass (mg/ml)			Glucose (mg/ml)
0	ND	ND	ND	0	0	0	19.4492	20.971	20.1
12	ND	ND	ND	0.052	0.006	0.216	22.0216	17.8024	22.5156
24	0.000324761	0.000337381	0.000138932	0.626	0.838	0.532	0	0	0
36	0.000110781	0.000122494	0.000207203	1.378	2.058	1.396	8.95003	8.08802	8.49006
48	0.000197846	0.000105048	0.000172235	1.728	1.78	2.27	4.52868	1.51107	3.8728
72	ND	ND	ND	1.574	1.946	2.004	0.220329	0.201306	0.234242
96	0.000162568	0.000110781	0.000136388	1.638	1.664	1.992	0.0634	0.0615	0.0649
120	ND	ND	ND	2.166	1.484	2.122	0	0	0
					ND= Not determined

## Sheet: Fig1_qPCR
	act1 gene	aclasin gene		2(-dCT)
Condition Name	Ct Mean	Ct Mean	dCt	Relative expression
24 h	11.345	22.9333	11.5883	0.000324761
24 h	11.97	23.5033	11.5333	0.000337381
24 h	11.7867	24.6	12.8133	0.000138932
36 h	12.95	26.09	13.14	0.000110781
36 h	13.095	26.09	12.995	0.000122494
36 h	13.7033	25.94	12.2367	0.000207203
48 h	16.3067	28.61	12.3033	0.000197846
48 h	15.84	29.0567	13.2167	0.000105048
48 h	15.61	28.1133	12.5033	0.000172235
96 h	13.8467	26.4333	12.5867	0.000162568
96 h	14.64	27.78	13.14	0.000110781
96 h	15.5933	28.4333	12.84	0.000136388

## Sheet: Fig 2
Heat shock
aclasin relative expression											hsp30 relative expression
Time	37 °C			47 °C			Control (28 °C)					37 °C			47 °C			Control (28 °C)
30 min	0.626091	0.646674	0.495782	0.700063	0.775871	0.646425	1.56254	0.734019	0.871892		30 min	7.41842	34.4026	47.9274	5.74245	20.7016	3.39874	1.23542	0.626332	1.29235
60 min	0.0537431	0.0620205	0.11627	0.368851	0.323337	0.356699	1.11299	0.97228	0.924094		60 min	309.878	129.987	368.935	5.34759	8.47897	3.86523	1.07343	1.17872	0.790346
Osmotic stress
aclasin relative expression
1 M NaCl	Control
0.199421	1.03327
0.293322	0.866871
0.26253	1.11643
Oxidative stress
aclasin relative expression					cat2 relative expression
5 mM H2O2	10 mM H2O2	Control			5 mM H2O2	10 mM H2O2	Control
1.63014	1.75119	0.788218			10.7654	11.6722	0.854607
2.48515	2.33755	1.26576			82.4244	16.5834	1.81714
2.15099	2.14602	1.00231			40.0853	14.6721	0.643941

## Sheet: Fig 2_qPCR
Heat shock
		act1 gene	hsp30 gene									act1	aclasin
Condition Name	Temperature (°C)	Ct Mean	Ct Mean	dCt	Control	ddCt	Relative hsp30 expression			Condition Name	Temperature (°C)	Ct Mean	Ct Mean	dCt	control	ddCt	Relative aclasin expression
30 min	47	11.8067	21.66	9.85333		-2.52167	5.74245			30 min	47	11.8067	24.345	12.5383		0.514444	0.700062
30 min	47	11.8467	19.85	8.00333		-4.37167	20.7015			30 min	47	11.8467	24.2367	12.39		0.366111	0.775871
30 min	47	11.9967	22.6067	10.61		-1.765	3.39874			30 min	47	11.9967	24.65	12.6533		0.629444	0.646425
30 min	28 (Control)	11.98	24.05	12.07		-0.305	1.23542			30 min	28 (Control)	11.98	23.36	11.38		-0.643889	1.56254
30 min	28 (Control)	12.1	25.15	13.05	12.375	0.675	0.626332			30 min	28 (Control)	12.1	24.57	12.47	12.0239	0.446111	0.734019
30 min	28 (Control)	12.115	24.12	12.005		-0.37	1.29235			30 min	28 (Control)	12.115	24.3367	12.2217		0.197778	0.871893
1 h	47	12.5567	22.215	9.65833		-2.41889	5.34759			1 h	47	12.5567	25.125	12.5683		1.43889	0.368851
1 h	47	12.3767	21.37	8.99333		-3.08389	8.47897			1 h	47	12.3767	25.135	12.7583		1.62889	0.323337
1 h	47	13.7333	23.86	10.1267		-1.95056	3.86523			1 h	47	13.7333	26.35	12.6167		1.48722	0.356699
1 h	28 (Control)	11.155	23.13	11.975		-0.102222	1.07343			1 h	28 (Control)	11.155	22.13	10.975		-0.154444	1.11299
1 h	28 (Control)	11.6967	23.5367	11.84	12.0772	-0.237222	1.17872			1 h	28 (Control)	11.6967	22.8667	11.17	11.1294	0.0405556	0.97228
1 h	28 (Control)	12.8067	25.2233	12.4167		0.339444	0.790346			1 h	28 (Control)	12.8067	24.05	11.2433		0.113889	0.924094
		act1	hsp30									act1	aclasin
Condition Name	Temperature (°C)	Cq Mean	Ct Mean	dCt	Control	ddCt	Relative hsp30 expression			Condition Name	Temperature (°C)	Mean Ct	Mean Ct	dCt	Control	ddCt	Relative aclasin expression
30 min	37	15.5	24.5133	9.01333		-2.89111	7.41842			30 min	37	14.7067	26.8	12.0933		0.675556	0.626091
30 min	37	13.66	20.46	6.8		-5.10444	34.4026			30 min	37	12.7567	24.8033	12.0467		0.628889	0.646674
30 min	37	13.955	20.2767	6.32167		-5.58278	47.9274			30 min	37	12.73	25.16	12.43		1.01222	0.495782
30 min	28 (Control)	13.935	26.1533	12.2183		0.313889	0.80447			30 min	28 (Control)	12.68	24.9167	12.2367		0.818889	0.566878
30 min	28 (Control)	14.18	24.96	10.78	11.9044	-1.12444	2.18018			30 min	28 (Control)	12.93	23.99	11.06	11.4178	-0.357778	1.28145
30 min	28 (Control)	14.605	27.32	12.715		0.810556	0.570162			30 min	28 (Control)	13.42	24.3767	10.9567		-0.461111	1.3766
1 h	37	13.685	18.35	4.665		-8.27556	309.878			1 h	37	12.4433	26.26	13.8167		4.21778	0.0537431
1 h	37	14.675	20.5933	5.91833		-7.02222	129.987			1 h	37	13.3567	26.9667	13.61		4.01111	0.0620205
1 h	37	15.23	19.6433	4.41333		-8.52722	368.935			1 h	37	13.6533	26.3567	12.7033		3.10444	0.11627
1 h	28 (Control)	14.435	27.9233	13.4883		0.547778	0.684073			1 h	28 (Control)	13.3867	22.2833	8.89667		-0.702222	1.62701
1 h	28 (Control)	13.925	26.39	12.465	12.9406	-0.475556	1.39045			1 h	28 (Control)	13.01	22.14	9.13	9.59889	-0.468889	1.38404
1 h	28 (Control)	13.815	26.6833	12.8683		-0.0722222	1.05133			1 h	28 (Control)	12.61	23.38	10.77		1.17111	0.444079
Osmotic stress
	act1	aclasin
Condition	Ct Mean	Ct Mean	dCt	Control	ddCt	Relative aclasin expression
1 M NaCl	13.49	24.5333	11.0433		2.32611	0.199421
1M NaCl	13.4733	23.96	10.4867		1.76944	0.293322
1M NaCl	14.63	25.2767	10.6467		1.92944	0.26253
Control	13.8733	22.5433	8.67		-0.0472222	1.03327
Control	13.9367	22.86	8.92333	8.71722	0.206111	0.866871
Control	13.5867	22.145	8.55833		-0.158889	1.11643
Oxidative stress
Condition	act	aclasin								Condition	cat2	act1
H2O2 (mM)	Ct Mean	Ct Mean	dCt	Control	ddCt	Relative aclasin expression				H2O2 (mM)	Ct Mean	Ct Mean	dCt	Control	ddCt	Relative cat2 expression
5	11.5	24.81	13.31		-0.705	1.63014				5	20.9933	11.5	9.49333		-3.42833	10.7654
5	11.7733	24.475	12.7017		-1.31333	2.48515				5	18.33	11.7733	6.55667		-6.365	82.4244
5	11.9033	24.8133	12.91		-1.105	2.15099				5	19.5	11.9033	7.59667		-5.325	40.0853
10	11.3733	24.58	13.2067		-0.808333	1.75119				10	20.75	11.3733	9.37667		-3.545	11.6722
10	11.9067	24.6967	12.79		-1.225	2.33755				10	20.7767	11.9067	8.87		-4.05167	16.5834
10	11.52	24.4333	12.9133		-1.10167	2.14602				10	20.5667	11.52	9.04667		-3.875	14.6721
Control	11.6167	25.975	14.3583		0.343333	0.788218				Control	24.765	11.6167	13.1483		0.226667	0.854607
Control	11.75	25.425	13.675	14.015	-0.34	1.26576				Control	23.81	11.75	12.06	12.9217	-0.861667	1.81714
Control	11.1733	25.185	14.0117		-0.00333333	1.00231				Control	24.73	11.1733	13.5567		0.635	0.643941

## Sheet: Fig 3
aclasin relative expression
Viable B. megaterium	Heat-killed B. megaterium	Control
1.53865	1.90308	1.12636
2.22427	1.95206	0.953739
1.95658	1.48281	0.93088

## Sheet: Sheet5
	act	aclasin
Condition	Ct Mean	Ct Mean	dCt		ddCt	Relative aclasin expression
Viable B. megaterium	11.97	25.09	13.12		-0.621667	1.53865
Viable B. megaterium	12.0767	24.665	12.5883		-1.15333	2.22427
Viable B. megaterium	12.33	25.1033	12.7733		-0.968333	1.95658
Heat-killed B. megaterium	12.61	25.4233	12.8133		-0.928333	1.90308
Heat-killed B. megaterium	12.69	25.4667	12.7767		-0.965	1.95206
Heat-killed B. megaterium	12.2567	25.43	13.1733		-0.568333	1.48281
Control	13.12	26.69	13.57		-0.171667	1.12636
Control	12.58	26.39	13.81	13.7417	0.0683333	0.953739
Control	12.2	26.045	13.845		0.103333	0.93088
